# Supplementary material for: Quality of human-computer interaction - results of a national usability survey of hospital-IT in Germany
Source: Springer Nature journal article supplement (doi:10.1186/1472-6947-11-69), 2011-11-09

# conformity with user expectations

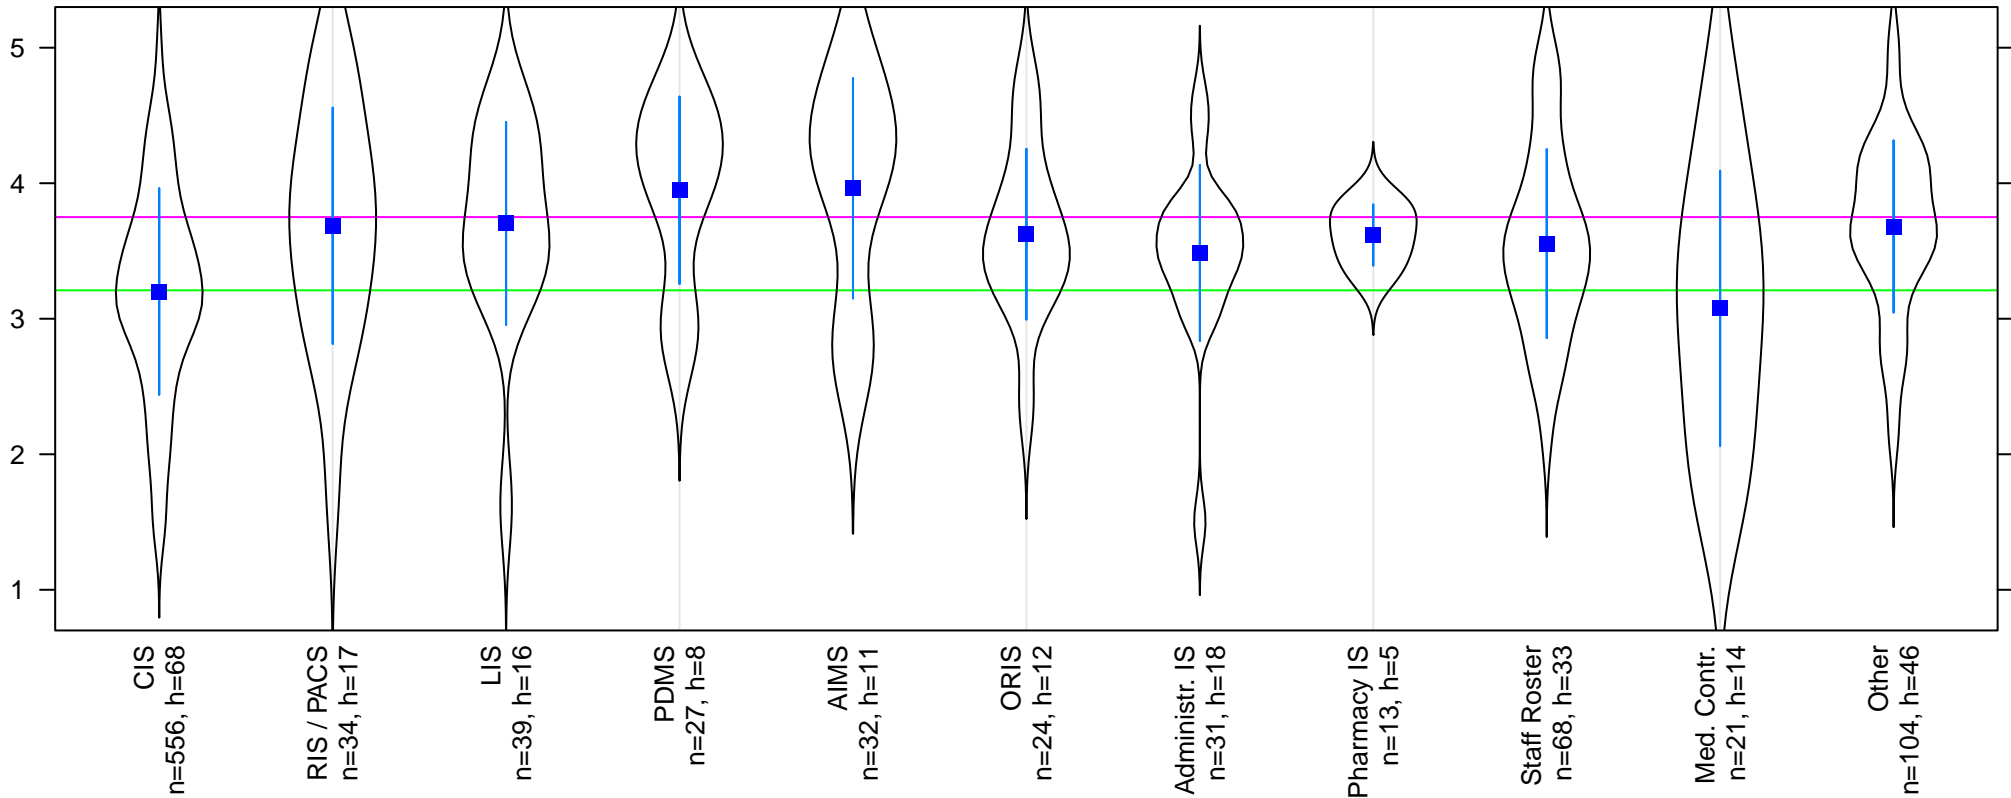

Supplement: 12911_2011_445_MOESM4_ESM.pdf [file 12911_2011_445_MOESM4_ESM.pdf]
